# Supplementary material for: Synthesis of a SAPO-34 membrane on macroporous supports for high permeance separation of a CO2/CH4 mixture
Source: Royal Society of Chemistry journal article supplement (doi:10.1039/b907237c), 2009-01-01
Supplement: b907237c.pdf [file b907237c.pdf]

## Supporting Information

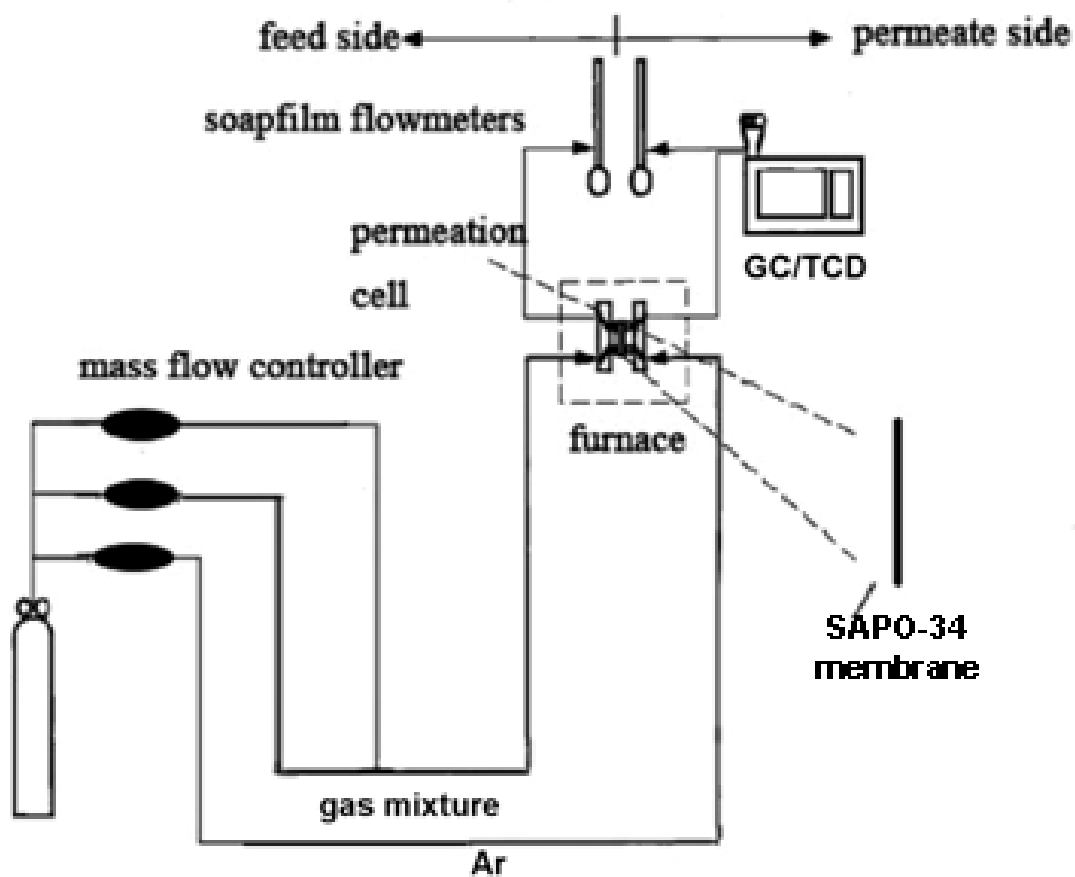

**Figure s1.** The experimental arrangement for gas-separation measurements with the SAPO-34 membrane at room temperature and at standard atmospheric pressure. One side of the membrane was swept by Ar while the other side was exposed to single gas or gas mixture. A soap-film flow meter is used to measure the flux of the gas and the volume ratio of the mixture gas detected is 1: 1.
